# Supplementary material
Source: MDPI journal article supplement (https://www.mdpi.com/2072-4292/14/11/2587)
Supplement: s1 [file s1]

**Table S1.** Results of NRMSE inversion at different depths of monthly ST at different timesteps.

| timesteps/<br>depths | 1             | 2      | 3             | 4             | 5             | 6             | 7             | 8             | 9      | 10            | 11            | 12     |
|----------------------|---------------|--------|---------------|---------------|---------------|---------------|---------------|---------------|--------|---------------|---------------|--------|
| <b>30</b>            | 0.0241        | 0.0225 | <b>0.0205</b> | 0.0224        | 0.0963        | 0.0236        | 0.0504        | 0.0219        | 0.0212 | 0.0267        | 0.0408        | 0.0356 |
| <b>50</b>            | 0.0317        | 0.0297 | 0.0279        | 0.0296        | <b>0.0266</b> | 0.0305        | 0.0287        | 0.0607        | 0.0268 | 0.0570        | 0.0700        | 0.0424 |
| <b>100</b>           | <b>0.0450</b> | 0.0453 | 0.0451        | 0.0498        | 0.0513        | 0.0870        | 0.0598        | 0.0563        | 0.0600 | 0.1088        | 0.0478        | 0.0465 |
| <b>150</b>           | 0.0575        | 0.0984 | <b>0.0543</b> | 0.0567        | 0.0547        | 0.0956        | 0.0930        | 0.0615        | 0.0916 | 0.0757        | 0.0681        | 0.0621 |
| <b>200</b>           | 0.0694        | 0.1644 | 0.0707        | 0.0759        | 0.0630        | 0.0727        | 0.1639        | 0.0732        | 0.0743 | 0.1156        | <b>0.0554</b> | 0.0601 |
| <b>300</b>           | 0.0505        | 0.0583 | 0.0499        | 0.0497        | 0.0477        | <b>0.0446</b> | 0.0510        | 0.0539        | 0.0473 | 0.0525        | 0.0694        | 0.0550 |
| <b>400</b>           | 0.0469        | 0.0550 | 0.0524        | 0.0634        | 0.0651        | 0.0584        | 0.0450        | 0.0466        | 0.0518 | <b>0.0423</b> | 0.0500        | 0.0491 |
| <b>500</b>           | 0.1170        | 0.1410 | 0.1334        | 0.1289        | 0.1215        | 0.1242        | 0.1448        | <b>0.1060</b> | 0.1226 | 0.1269        | 0.1288        | 0.1385 |
| <b>600</b>           | 0.0799        | 0.0950 | 0.0933        | 0.1201        | 0.0791        | 0.0982        | <b>0.0755</b> | 0.0948        | 0.0877 | 0.0883        | 0.1018        | 0.0890 |
| <b>700</b>           | 0.0483        | 0.0576 | <b>0.0474</b> | 0.0547        | 0.0563        | 0.0513        | 0.0516        | 0.0529        | 0.0642 | 0.0507        | 0.0576        | 0.0516 |
| <b>800</b>           | <b>0.0382</b> | 0.0618 | 0.0469        | 0.0434        | 0.0477        | 0.0553        | 0.0526        | 0.0515        | 0.0393 | 0.0419        | 0.0604        | 0.0524 |
| <b>900</b>           | 0.0520        | 0.0523 | <b>0.0509</b> | 0.0585        | 0.0514        | 0.0669        | 0.0623        | 0.0567        | 0.0620 | 0.0593        | 0.0554        | 0.0537 |
| <b>1000</b>          | <b>0.0811</b> | 0.0959 | 0.1012        | 0.0849        | 0.0933        | 0.0899        | 0.1021        | 0.0920        | 0.0904 | 0.0895        | 0.0871        | 0.0843 |
| <b>1100</b>          | 0.1234        | 0.1308 | 0.1324        | 0.1350        | 0.1335        | <b>0.1203</b> | 0.1304        | 0.1351        | 0.1315 | 0.1373        | 0.1245        | 0.1251 |
| <b>1200</b>          | 0.1209        | 0.1289 | 0.1320        | 0.1269        | 0.1346        | <b>0.1184</b> | 0.1299        | 0.1279        | 0.1229 | 0.1335        | 0.1273        | 0.1220 |
| <b>1300</b>          | 0.1065        | 0.1137 | 0.1161        | 0.1095        | 0.1050        | 0.1127        | 0.1239        | 0.1093        | 0.1155 | <b>0.1043</b> | 0.1101        | 0.1126 |
| <b>1400</b>          | 0.0801        | 0.1044 | 0.0998        | 0.0843        | 0.0901        | 0.0872        | 0.0881        | 0.0851        | 0.0979 | <b>0.0350</b> | 0.0813        | 0.0877 |
| <b>1500</b>          | 0.0630        | 0.0746 | 0.0673        | <b>0.0601</b> | 0.0632        | 0.0703        | 0.0689        | 0.0683        | 0.0717 | 0.0603        | 0.0675        | 0.0675 |
| <b>1600</b>          | 0.0559        | 0.0599 | 0.0622        | <b>0.0532</b> | 0.0634        | 0.0650        | 0.0681        | 0.0579        | 0.0545 | 0.0621        | 0.0544        | 0.0656 |
| <b>1700</b>          | 0.0428        | 0.0516 | 0.0481        | 0.0579        | 0.0560        | 0.0483        | 0.0479        | 0.0525        | 0.0405 | 0.0464        | <b>0.0369</b> | 0.0472 |
| <b>1800</b>          | 0.0258        | 0.0308 | 0.0308        | 0.0246        | 0.0301        | 0.0293        | 0.0272        | 0.0301        | 0.0269 | 0.0309        | <b>0.0181</b> | 0.0286 |
| <b>1900</b>          | 0.0169        | 0.0179 | 0.0175        | 0.0210        | 0.0195        | 0.0164        | 0.0202        | 0.0229        | 0.0169 | <b>0.0164</b> | 0.0181        | 0.0174 |
| <b>MEAN</b>          | <b>0.0626</b> | 0.0768 | 0.0682        | 0.0687        | 0.0704        | 0.0712        | 0.0766        | 0.0690        | 0.0690 | 0.0710        | 0.0696        | 0.0679 |

**Table S2.** Results of NRMSE inversion at different depths of monthly SS at different timesteps.

| timesteps/<br>depths | 1             | 2             | 3             | 4             | 5             | 6             | 7             | 8      | 9             | 10            | 11     | 12            |
|----------------------|---------------|---------------|---------------|---------------|---------------|---------------|---------------|--------|---------------|---------------|--------|---------------|
| <b>30</b>            | 0.0036        | 0.0037        | 0.0056        | 0.0038        | 0.0037        | 0.0040        | 0.0035        | 0.0057 | <b>0.0031</b> | 0.0061        | 0.0060 | 0.0077        |
| <b>50</b>            | 0.0036        | 0.0036        | 0.0037        | <b>0.0033</b> | 0.0035        | 0.0033        | 0.0035        | 0.0049 | 0.0041        | 0.0058        | 0.0036 | 0.0052        |
| <b>100</b>           | 0.0039        | 0.0036        | 0.0036        | 0.0034        | 0.0035        | 0.0043        | 0.0039        | 0.0046 | 0.0035        | 0.0044        | 0.0035 | <b>0.0033</b> |
| <b>150</b>           | 0.0048        | 0.0047        | 0.0047        | 0.0048        | 0.0053        | 0.0049        | 0.0047        | 0.0064 | <b>0.0039</b> | 0.0045        | 0.0040 | 0.0051        |
| <b>200</b>           | 0.0032        | 0.0042        | 0.0034        | 0.0036        | 0.0039        | 0.0046        | 0.0039        | 0.0043 | 0.0042        | <b>0.0031</b> | 0.0037 | 0.0043        |
| <b>300</b>           | 0.0022        | 0.0024        | 0.0024        | <b>0.0022</b> | 0.0029        | 0.0022        | 0.0025        | 0.0028 | 0.0028        | 0.0028        | 0.0030 | 0.0029        |
| <b>400</b>           | <b>0.0058</b> | 0.0061        | 0.0059        | 0.0065        | 0.0065        | 0.0068        | 0.0062        | 0.0065 | 0.0060        | 0.0061        | 0.0061 | 0.0065        |
| <b>500</b>           | 0.0058        | 0.0062        | 0.0057        | 0.0059        | 0.0062        | 0.0056        | <b>0.0055</b> | 0.0058 | 0.0062        | 0.0061        | 0.0060 | 0.0060        |
| <b>600</b>           | 0.0042        | 0.0055        | 0.0044        | 0.0048        | 0.0050        | <b>0.0041</b> | 0.0043        | 0.0046 | 0.0042        | 0.0044        | 0.0043 | 0.0043        |
| <b>700</b>           | 0.0038        | <b>0.0037</b> | 0.0037        | 0.0038        | 0.0038        | 0.0043        | 0.0040        | 0.0037 | 0.0037        | 0.0037        | 0.0038 | 0.0040        |
| <b>800</b>           | 0.0028        | 0.0031        | 0.0031        | 0.0028        | <b>0.0028</b> | 0.0032        | 0.0028        | 0.0028 | 0.0033        | 0.0028        | 0.0028 | 0.0028        |
| <b>900</b>           | 0.0028        | 0.0029        | <b>0.0027</b> | 0.0028        | 0.0030        | 0.0029        | 0.0029        | 0.0028 | 0.0031        | 0.0029        | 0.0029 | 0.0029        |
| <b>1000</b>          | 0.0032        | 0.0031        | 0.0032        | 0.0031        | 0.0031        | 0.0030        | 0.0031        | 0.0032 | 0.0034        | 0.0030        | 0.0034 | <b>0.0030</b> |
| <b>1100</b>          | 0.0034        | 0.0034        | <b>0.0030</b> | 0.0035        | 0.0034        | 0.0034        | 0.0034        | 0.0035 | 0.0032        | 0.0034        | 0.0035 | 0.0035        |
| <b>1200</b>          | 0.0030        | <b>0.0029</b> | 0.0030        | 0.0030        | 0.0030        | 0.0030        | 0.0030        | 0.0030 | 0.0029        | 0.0029        | 0.0031 | 0.0031        |
| <b>1300</b>          | 0.0009        | 0.0009        | 0.0009        | <b>0.0003</b> | 0.0009        | 0.0008        | 0.0009        | 0.0008 | 0.0009        | 0.0008        | 0.0009 | 0.0009        |
| <b>1400</b>          | 0.0003        | 0.0003        | 0.0003        | 0.0003        | 0.0003        | 0.0003        | 0.0003        | 0.0003 | 0.0003        | 0.0003        | 0.0003 | <b>0.0003</b> |
| <b>1500</b>          | 0.0008        | 0.0009        | <b>0.0007</b> | 0.0009        | 0.0008        | 0.0008        | 0.0008        | 0.0008 | 0.0008        | 0.0008        | 0.0008 | 0.0008        |
| <b>1600</b>          | 0.0005        | 0.0005        | 0.0004        | 0.0006        | 0.0005        | 0.0005        | 0.0005        | 0.0005 | 0.0006        | 0.0005        | 0.0006 | <b>0.0004</b> |
| <b>1700</b>          | 0.0004        | 0.0003        | 0.0003        | 0.0003        | 0.0003        | 0.0003        | 0.0005        | 0.0003 | <b>0.0002</b> | 0.0004        | 0.0003 | 0.0004        |
| <b>1800</b>          | 0.0002        | 0.0004        | 0.0004        | 0.0003        | <b>0.0002</b> | 0.0003        | 0.0003        | 0.0002 | 0.0003        | 0.0002        | 0.0003 | 0.0003        |
| <b>1900</b>          | 0.0002        | 0.0002        | 0.0002        | 0.0002        | 0.0002        | 0.0002        | 0.0002        | 0.0002 | 0.0002        | <b>0.0002</b> | 0.0002 | 0.0002        |
| <b>MEAN</b>          | <b>0.0027</b> | 0.0028        | 0.0028        | 0.0027        | 0.0029        | 0.0029        | 0.0028        | 0.0031 | 0.0028        | 0.0030        | 0.0029 | 0.0031        |

**Table S3.** Results of NRMSE inversion at different depths of daily ST at different timesteps.

| timesteps/<br>depths | 1             | 2             | 3             | 4      | 5      | 6      | 7             | 8             | 9             | 10            | 11            | 12            |
|----------------------|---------------|---------------|---------------|--------|--------|--------|---------------|---------------|---------------|---------------|---------------|---------------|
| <b>30</b>            | 0.0169        | 0.0165        | 0.0138        | 0.0322 | 0.0144 | 0.0253 | 0.0371        | 0.0384        | 0.0133        | 0.0132        | 0.0117        | <b>0.0115</b> |
| <b>50</b>            | 0.0673        | 0.0720        | 0.0761        | 0.0385 | 0.0422 | 0.0420 | <b>0.0288</b> | 0.0357        | 0.0410        | 0.0382        | 0.0335        | 0.0380        |
| <b>100</b>           | 0.0792        | 0.0678        | 0.0684        | 0.0716 | 0.0760 | 0.0726 | 0.0931        | 0.0836        | <b>0.0480</b> | 0.1013        | 0.0945        | 0.0731        |
| <b>150</b>           | 0.0774        | 0.0824        | 0.0730        | 0.0611 | 0.0630 | 0.0427 | <b>0.0405</b> | 0.0505        | 0.0569        | 0.0728        | 0.0912        | 0.0648        |
| <b>200</b>           | <b>0.0326</b> | 0.0595        | 0.0843        | 0.0720 | 0.0844 | 0.0557 | 0.0606        | 0.0612        | 0.0595        | 0.0789        | 0.0492        | 0.0485        |
| <b>300</b>           | <b>0.0323</b> | 0.1199        | 0.1560        | 0.0367 | 0.0576 | 0.0400 | 0.0369        | 0.0397        | 0.0408        | 0.0393        | 0.0363        | 0.0672        |
| <b>400</b>           | 0.0651        | 0.0476        | <b>0.0375</b> | 0.0387 | 0.0441 | 0.0388 | 0.0419        | 0.0489        | 0.0404        | 0.0925        | 0.0999        | 0.1354        |
| <b>500</b>           | 0.1347        | 0.2255        | 0.1382        | 0.1267 | 0.1480 | 0.1581 | 0.1496        | 0.1361        | 0.1625        | <b>0.1057</b> | 0.1138        | 0.1398        |
| <b>600</b>           | 0.0252        | 0.0246        | 0.0251        | 0.0369 | 0.0297 | 0.0425 | 0.0275        | <b>0.0244</b> | 0.0309        | 0.0310        | 0.0748        | 0.0664        |
| <b>700</b>           | 0.0394        | 0.1742        | 0.0457        | 0.0443 | 0.0362 | 0.0723 | 0.0506        | 0.0388        | 0.0404        | 0.0588        | <b>0.0352</b> | 0.0379        |
| <b>800</b>           | 0.0373        | <b>0.0268</b> | 0.0290        | 0.1372 | 0.0277 | 0.0322 | 0.0322        | 0.0273        | 0.0292        | 0.0288        | 0.0291        | 0.0269        |
| <b>900</b>           | 0.1531        | 0.1786        | 0.1807        | 0.1618 | 0.1588 | 0.1617 | 0.1590        | 0.1587        | 0.1908        | 0.1608        | 0.1651        | <b>0.1303</b> |
| <b>1000</b>          | 0.1782        | 0.1959        | 0.1873        | 0.1778 | 0.1797 | 0.1908 | 0.1755        | 0.1781        | 0.1923        | <b>0.1391</b> | 0.1497        | 0.1905        |
| <b>1250</b>          | 0.1186        | 0.1292        | 0.1248        | 0.1226 | 0.1346 | 0.1230 | 0.1265        | 0.1235        | 0.1210        | <b>0.1048</b> | 0.1511        | 0.1126        |
| <b>1500</b>          | 0.1099        | 0.1482        | 0.1084        | 0.1053 | 0.1255 | 0.1047 | 0.1063        | 0.1237        | 0.1030        | <b>0.0800</b> | 0.1189        | 0.0835        |
| <b>2000</b>          | 0.1842        | 0.1835        | 0.1871        | 0.2005 | 0.1993 | 0.1899 | 0.1903        | 0.2054        | <b>0.1830</b> | 0.1898        | 0.1914        | 0.1902        |
| <b>MEAN</b>          | 0.0845        | 0.1095        | 0.0960        | 0.0915 | 0.0888 | 0.0870 | 0.0848        | 0.0859        | 0.0846        | <b>0.0834</b> | 0.0903        | 0.0885        |

**Table S4.** Results of NRMSE inversion at different depths of daily S at different timesteps.

| timesteps/<br>depths | 1             | 2             | 3      | 4             | 5             | 6      | 7             | 8             | 9             | 10     | 11     | 12            |
|----------------------|---------------|---------------|--------|---------------|---------------|--------|---------------|---------------|---------------|--------|--------|---------------|
| <b>30</b>            | 0.0014        | 0.0019        | 0.0017 | 0.0023        | 0.0048        | 0.0016 | 0.0018        | <b>0.0013</b> | 0.0032        | 0.0036 | 0.0040 | 0.0022        |
| <b>50</b>            | 0.0034        | 0.0033        | 0.0040 | 0.0032        | 0.0032        | 0.0034 | <b>0.0029</b> | 0.0044        | 0.0059        | 0.0029 | 0.0031 | 0.0046        |
| <b>100</b>           | 0.0025        | <b>0.0025</b> | 0.0027 | 0.0029        | 0.0025        | 0.0025 | 0.0032        | 0.0027        | 0.0027        | 0.0026 | 0.0026 | 0.0028        |
| <b>150</b>           | 0.0031        | 0.0031        | 0.0031 | 0.0031        | 0.0032        | 0.0043 | 0.0039        | <b>0.0030</b> | 0.0031        | 0.0033 | 0.0033 | 0.0031        |
| <b>200</b>           | 0.0089        | 0.0101        | 0.0090 | 0.0089        | 0.0093        | 0.0105 | <b>0.0087</b> | 0.0132        | 0.0129        | 0.0127 | 0.0127 | 0.0132        |
| <b>300</b>           | <b>0.0026</b> | 0.0033        | 0.0041 | 0.0040        | 0.0034        | 0.0036 | 0.0046        | 0.0037        | 0.0035        | 0.0037 | 0.0033 | 0.0029        |
| <b>400</b>           | 0.0017        | 0.0017        | 0.0019 | 0.0020        | 0.0017        | 0.0018 | 0.0025        | 0.0022        | <b>0.0016</b> | 0.0019 | 0.0016 | 0.0022        |
| <b>500</b>           | 0.0050        | 0.0053        | 0.0050 | 0.0050        | 0.0058        | 0.0054 | 0.0050        | 0.0050        | 0.0050        | 0.0049 | 0.0052 | <b>0.0048</b> |
| <b>600</b>           | 0.0006        | 0.0006        | 0.0007 | 0.0006        | 0.0006        | 0.0006 | 0.0006        | <b>0.0006</b> | 0.0008        | 0.0006 | 0.0007 | 0.0006        |
| <b>700</b>           | 0.0034        | 0.0034        | 0.0036 | <b>0.0034</b> | 0.0034        | 0.0039 | 0.0040        | 0.0034        | 0.0034        | 0.0035 | 0.0035 | 0.0034        |
| <b>800</b>           | 0.0011        | 0.0011        | 0.0004 | 0.0004        | <b>0.0004</b> | 0.0004 | 0.0004        | 0.0004        | 0.0006        | 0.0005 | 0.0005 | 0.0005        |
| <b>900</b>           | <b>0.0018</b> | 0.0018        | 0.0018 | 0.0020        | 0.0018        | 0.0020 | 0.0020        | 0.0019        | 0.0018        | 0.0018 | 0.0020 | 0.0019        |
| <b>1000</b>          | <b>0.0023</b> | 0.0026        | 0.0027 | 0.0024        | 0.0025        | 0.0028 | 0.0024        | 0.0024        | 0.0025        | 0.0027 | 0.0027 | 0.0031        |
| <b>1250</b>          | 0.0009        | 0.0009        | 0.0003 | <b>0.0003</b> | 0.0004        | 0.0006 | 0.0005        | 0.0005        | 0.0007        | 0.0008 | 0.0008 | 0.0013        |
| <b>1500</b>          | 0.0006        | 0.0006        | 0.0006 | 0.0006        | <b>0.0005</b> | 0.0006 | 0.0006        | 0.0007        | 0.0007        | 0.0008 | 0.0010 | 0.0007        |
| <b>2000</b>          | 0.0002        | 0.0002        | 0.0002 | 0.0002        | 0.0002        | 0.0002 | <b>0.0002</b> | 0.0002        | 0.0002        | 0.0002 | 0.0002 | 0.0002        |
| <b>MEAN</b>          | <b>0.0025</b> | 0.0026        | 0.0026 | 0.0026        | 0.0027        | 0.0028 | 0.0027        | 0.0029        | 0.0030        | 0.0029 | 0.0030 | 0.0030        |
